# Supplementary material for: What Is the Cause of Toxicity of Silicone Oil?
Source: MDPI journal article supplement (doi:10.3390/ma15010269), 2021-12-30
Supplement: s1 [file s1]

**Supplementary Table S1. Statistical comparison on cell viability between different study groups within observation times (up to 72 hours)**

| Cell Types | Forms           | Time points | L2      | L3      | L4      | L5      | D4      | D5      | Control Groups |
|------------|-----------------|-------------|---------|---------|---------|---------|---------|---------|----------------|
| rMC-1      | Liquid Form     | 6hours      | <0.0001 | <0.0001 | >0.9999 | >0.9999 | <0.0001 | >0.9999 | Media          |
|            |                 | 24hours     | <0.0001 | <0.0001 | <0.0001 | >0.9999 | <0.0001 | <0.0001 |                |
|            |                 | 72hours     | <0.0001 | <0.0001 | <0.0001 | <0.0001 | <0.0001 | <0.0001 |                |
|            |                 | 6hours      | <0.0001 | <0.0001 | 0.0002  | 0.35    | <0.0001 | 0.01    | SilOil1000     |
|            |                 | 24hours     | <0.0001 | <0.0001 | <0.0001 | >0.9999 | <0.0001 | <0.0001 |                |
|            |                 | 72hours     | <0.0001 | <0.0001 | <0.0001 | 0.15    | <0.0001 | <0.0001 |                |
|            | Emulsified Form | 6hours      | <0.0001 | 0.03    | >0.9999 | 0.69    | <0.0001 | >0.9999 | Media          |
|            |                 | 24hours     | <0.0001 | <0.0001 | 0.02    | >0.9999 | <0.0001 | 0.39    |                |
|            |                 | 72hours     | <0.0001 | <0.0001 | <0.0001 | >0.9999 | <0.0001 | <0.0001 |                |
|            |                 | 6hours      | <0.0001 | <0.0001 | 0.89    | 0.0002  | <0.0001 | 0.11    | SilOil1000     |
|            |                 | 24hours     | <0.0001 | <0.0001 | 0.03    | >0.9999 | <0.0001 | 0.51    |                |
|            |                 | 72hours     | <0.0001 | 0.0001  | <0.0001 | >0.9999 | <0.0001 | <0.0001 |                |
| 661W       | Liquid Form     | 6hours      | <0.0001 | <0.0001 | >0.9999 | 0.04    | <0.0001 | 0.65    | Media          |
|            |                 | 24hours     | <0.0001 | <0.0001 | <0.0001 | >0.9999 | <0.0001 | <0.0001 |                |
|            |                 | 72hours     | <0.0001 | <0.0001 | <0.0001 | >0.9999 | <0.0001 | <0.0001 |                |
|            |                 | 6hours      | <0.0001 | <0.0001 | >0.9999 | >0.9999 | <0.0001 | >0.9999 | SilOil1000     |
|            |                 | 24hours     | <0.0001 | <0.0001 | <0.0001 | >0.9999 | <0.0001 | <0.0001 |                |
|            |                 | 72hours     | <0.0001 | <0.0001 | <0.0001 | 0.46    | <0.0001 | <0.0001 |                |
|            | Emulsified Form | 6hours      | <0.0001 | 0.0059  | >0.9999 | 0.11    | <0.0001 | 0.29    | Media          |
|            |                 | 24hours     | <0.0001 | <0.0001 | 0.69    | >0.9999 | <0.0001 | 0.04    |                |
|            |                 | 72hours     | <0.0001 | 0.01    | 0.0001  | 0.19    | <0.0001 | <0.0001 |                |

|         |                 |         |         |         |         |         |         |         |            |
|---------|-----------------|---------|---------|---------|---------|---------|---------|---------|------------|
| ARPE-19 | Liquid Form     | 6hours  | <0.0001 | <0.0001 | <0.0001 | >0.9999 | <0.0001 | 0.45    | Media      |
|         |                 | 24hours | <0.0001 | <0.0001 | <0.0001 | >0.9999 | <0.0001 | <0.0001 |            |
|         |                 | 72hours | <0.0001 | <0.0001 | 0.41    | 0.99    | <0.0001 | 0.80    |            |
|         |                 | 6hours  | <0.0001 | <0.0001 | <0.0001 | 0.99    | <0.0001 | 0.03    | SilOil1000 |
|         |                 | 24hours | <0.0001 | <0.0001 | <0.0001 | 0.83    | <0.0001 | <0.0001 |            |
|         |                 | 72hours | <0.0001 | <0.0001 | 0.24    | 0.94    | <0.0001 | 0.60    |            |
|         | Emulsified Form | 6hours  | <0.0001 | 0.0002  | <0.0001 | <0.0001 | 0.0001  | 0.0002  | Media      |
|         |                 | 24hours | <0.0001 | <0.0001 | <0.0001 | <0.0001 | <0.0001 | <0.0001 |            |
|         |                 | 72hours | <0.0001 | <0.0001 | <0.0001 | <0.0001 | <0.0001 | <0.0001 |            |
|         |                 | 6hours  | <0.0001 | 0.97    | >0.9999 | >0.9999 | 0.99    | 0.96    | SilOil1000 |
|         |                 | 24hours | <0.0001 | 0.0079  | 0.72    | 0.07    | <0.0001 | 0.20    |            |
|         |                 | 72hours | >0.9999 | >0.9999 | >0.9999 | >0.9999 | 0.02    | >0.9999 |            |

\*Significant and non-significant values are shown in grey and white boxes respectively.
